# Supplementary material for: Channelled crystals formed by tubular stacking of a 4 + 4 phenylene-piperazinemacrocycle
Source: Royal Society of Chemistry journal article supplement (doi:10.1039/b917953d), 2009-11-10
Supplement: b917953d.pdf [file b917953d.pdf]

## Channeled solvated crystals formed by a 4+4 phenylene-piperazine macrocycle

Conor Dawson,<sup>a</sup> Peter N. Horton<sup>b</sup> Michael B. Hursthouse<sup>b</sup> and Stuart L. James\*<sup>a</sup>

Supplementary information

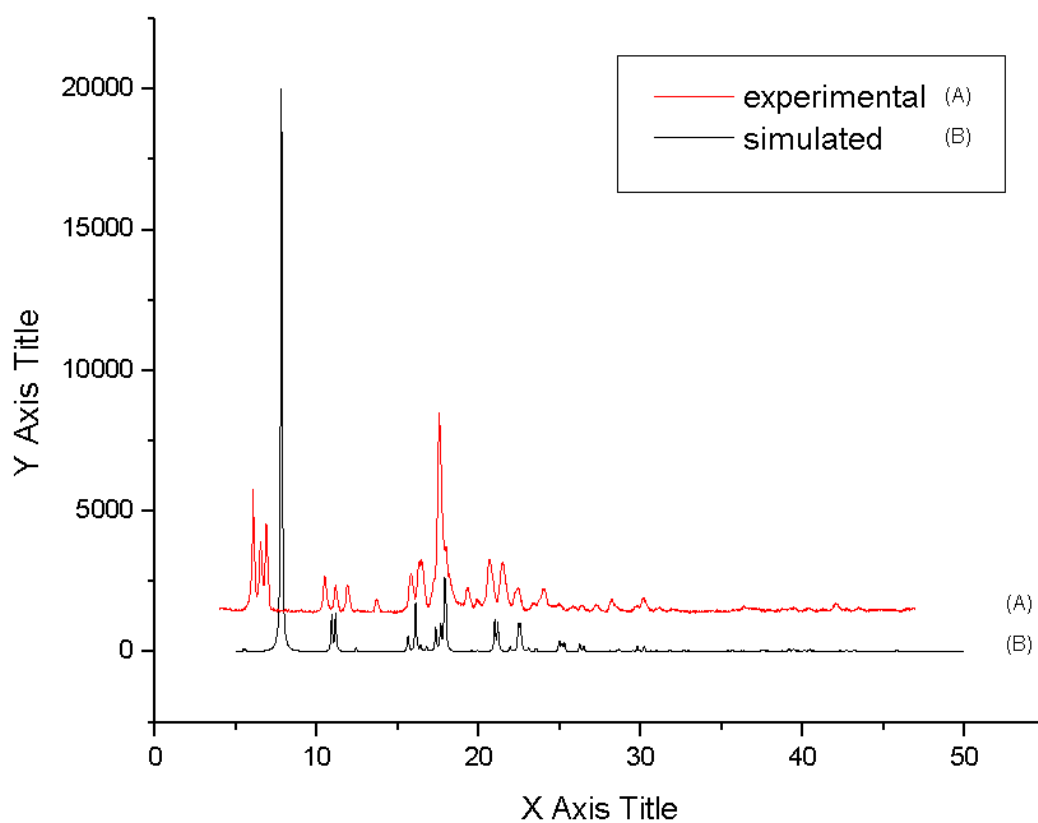

**Figure S1** Comparison of experimental XRPD pattern for the crushed, desolvated crystals and the simulated pattern from the single-crystal determination.

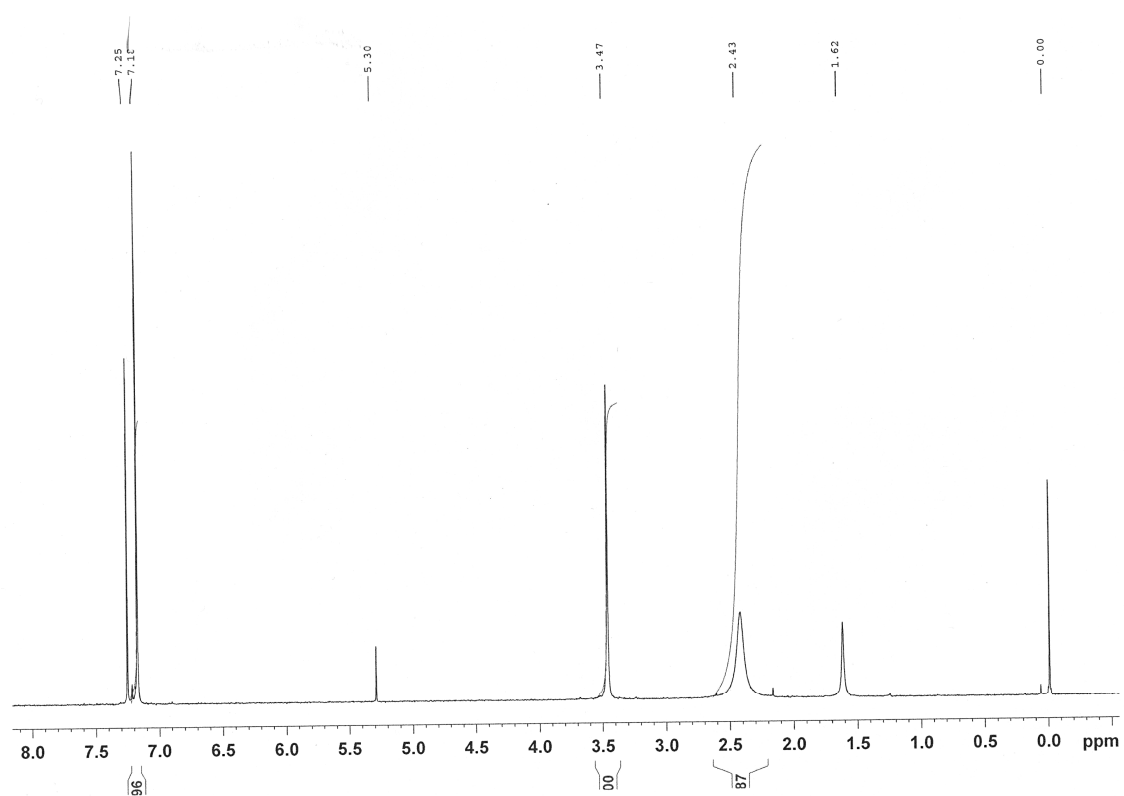

**Figure S2**  $^1\text{H}$  NMR spectrum of dried **1** at 298K ( $\text{CDCl}_3$ , 300 MHz).

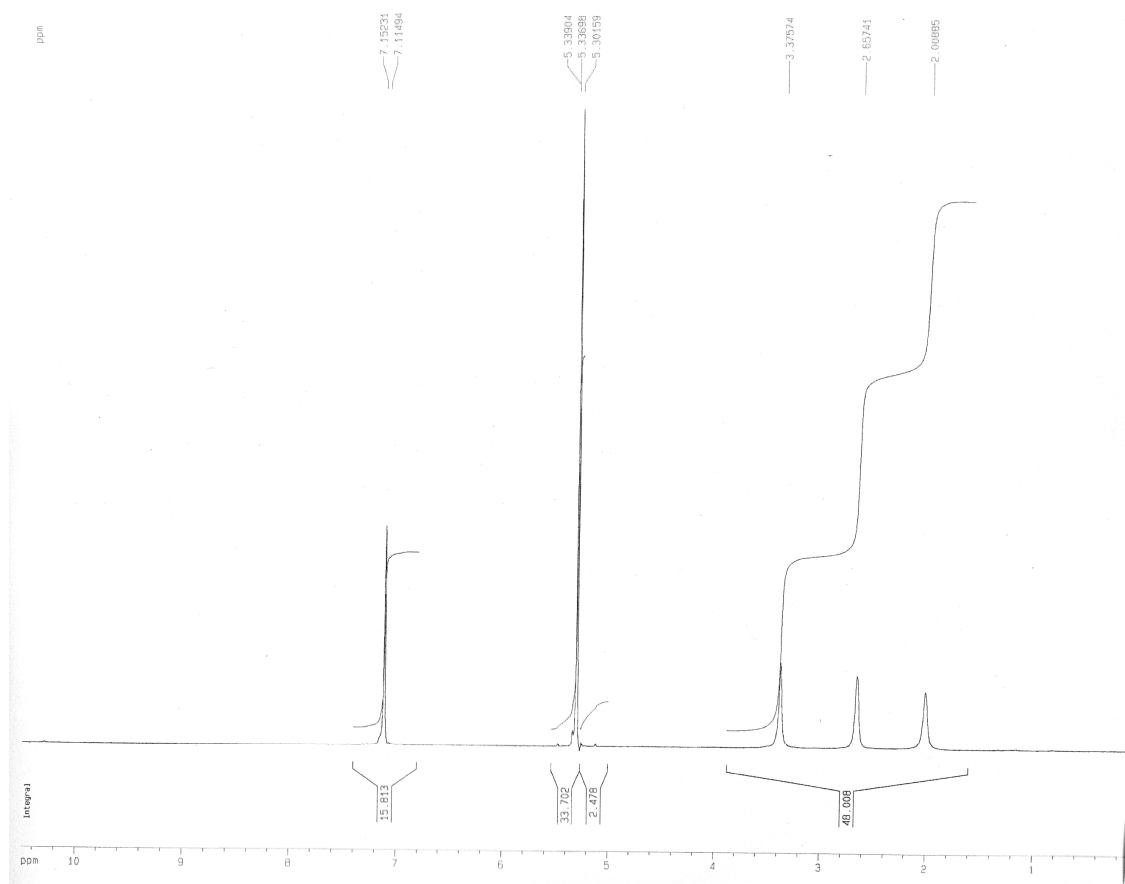

**Figure S3**  $^1\text{H}$  NMR spectrum of **1** at  $-60^\circ\text{C}$  ( $\text{CD}_2\text{Cl}_2$ , 500 MHz).

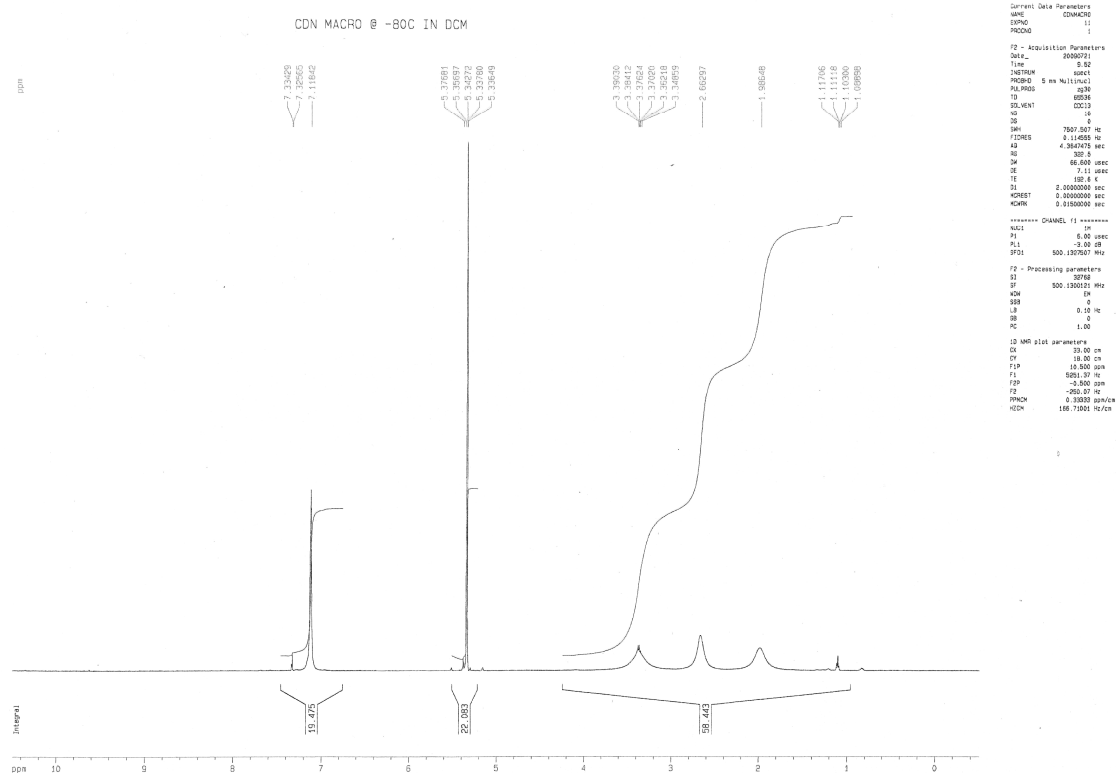

Figure S4  $^1\text{H}$  NMR spectrum of **1** at  $-80^\circ\text{C}$  ( $\text{CD}_2\text{Cl}_2$ , 500 MHz).
